# Supplementary material for: Highlight Induced Transcriptional Priming against a Subsequent Drought Stress in Arabidopsis thaliana
Source: MDPI journal article supplement (doi:10.3390/ijms24076608), 2023-04-01
Supplement: s1 [file s1]

## Supplementary Information

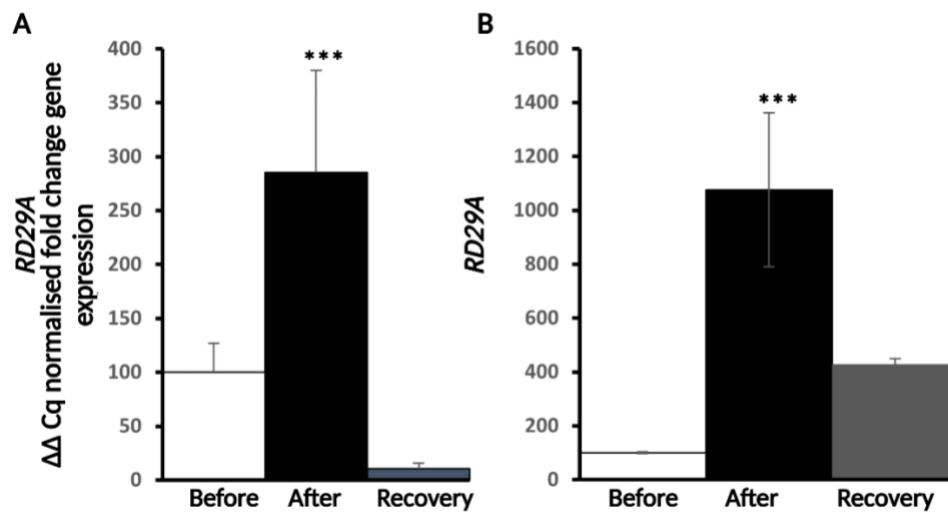

**Figure S1: Single D stress experimental scheme and marker gene expression, related to Figure 1**  
 (A) Expression pattern of *RD29A* in WT from second biological replicate. (B) Expression pattern of *RD29A* in WT from third biological replicate. Error bars represent SD values. \*\*\*  $p < 0.001$ .

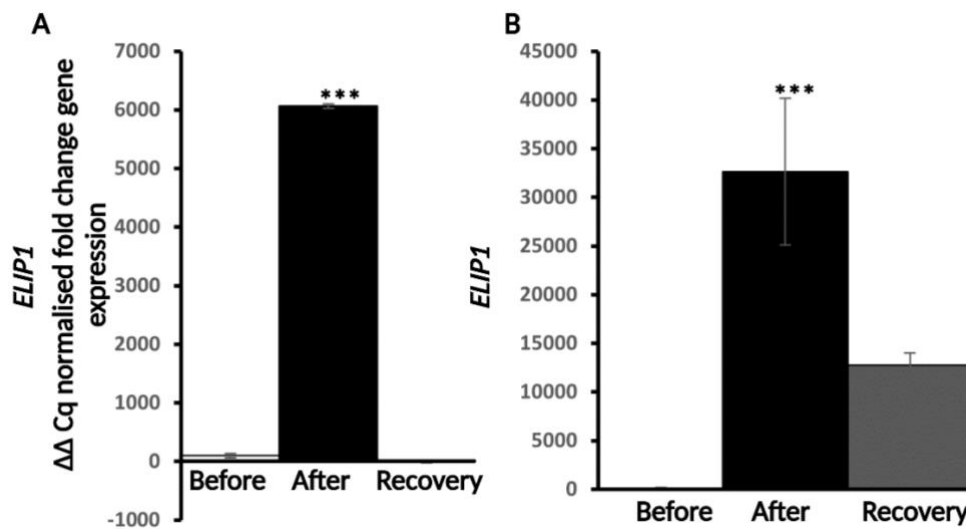

**Figure S2: Single HL stress experimental scheme and marker gene expression, related to Figure 2**  
 (A) Expression pattern of *ELIP1* in WT from second biological replicate. (B) Expression pattern of *ELIP1* in WT from third biological replicate. Error bars represent SD values. \*\*\*  $p < 0.001$ .

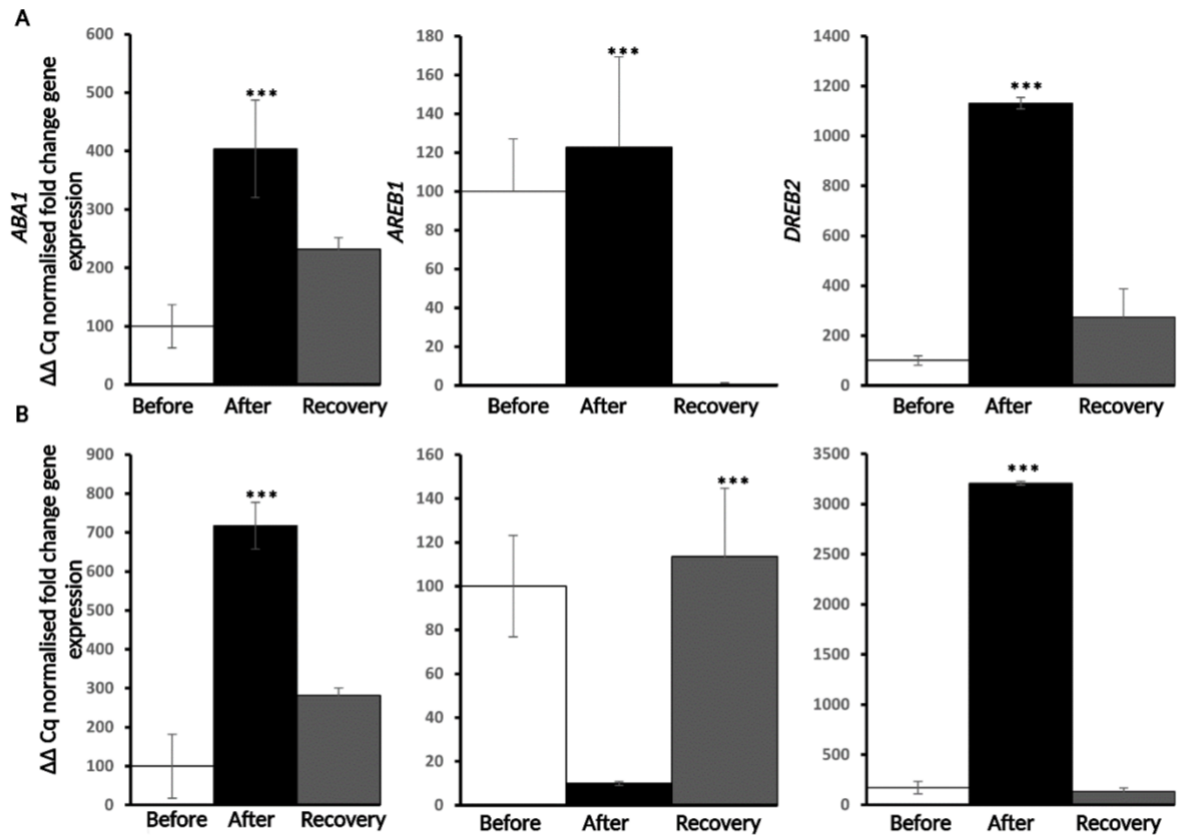

**Figure S3. D and HL triggers expression of ABA responsive gene, related to Figure 3**

(A) The fold change gene expression of ABA genes in WT from single D stress experiment. (B) Expression of the same ABA genes in WT from single HL stress experiment. Data is a representation of second biological replicate with SD values. \*\*\*  $p < 0.001$ .

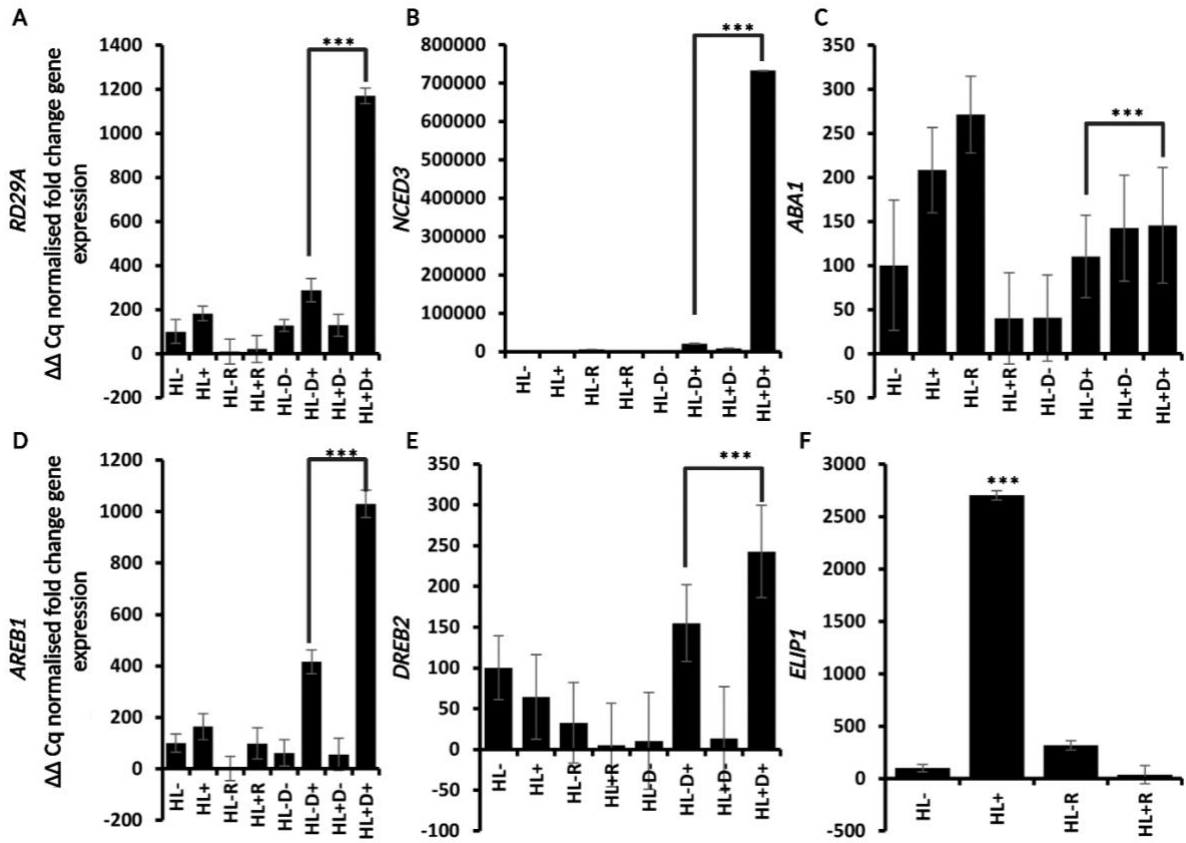

**Figure S4: *RD29A* and ABA responsive genes expression pattern in Col-O, related to Figure 5**

(A-E) qPCR analysis of *RD29A*, *NCED3*, *ABA1*, *AREB1*, and *DREB2* at 3 timepoints. (F) Expression analysis of *ELIP1* only at the first two timepoints. Data is a representation of second biological replicate with SD values. \*\*\*  $p < 0.001$

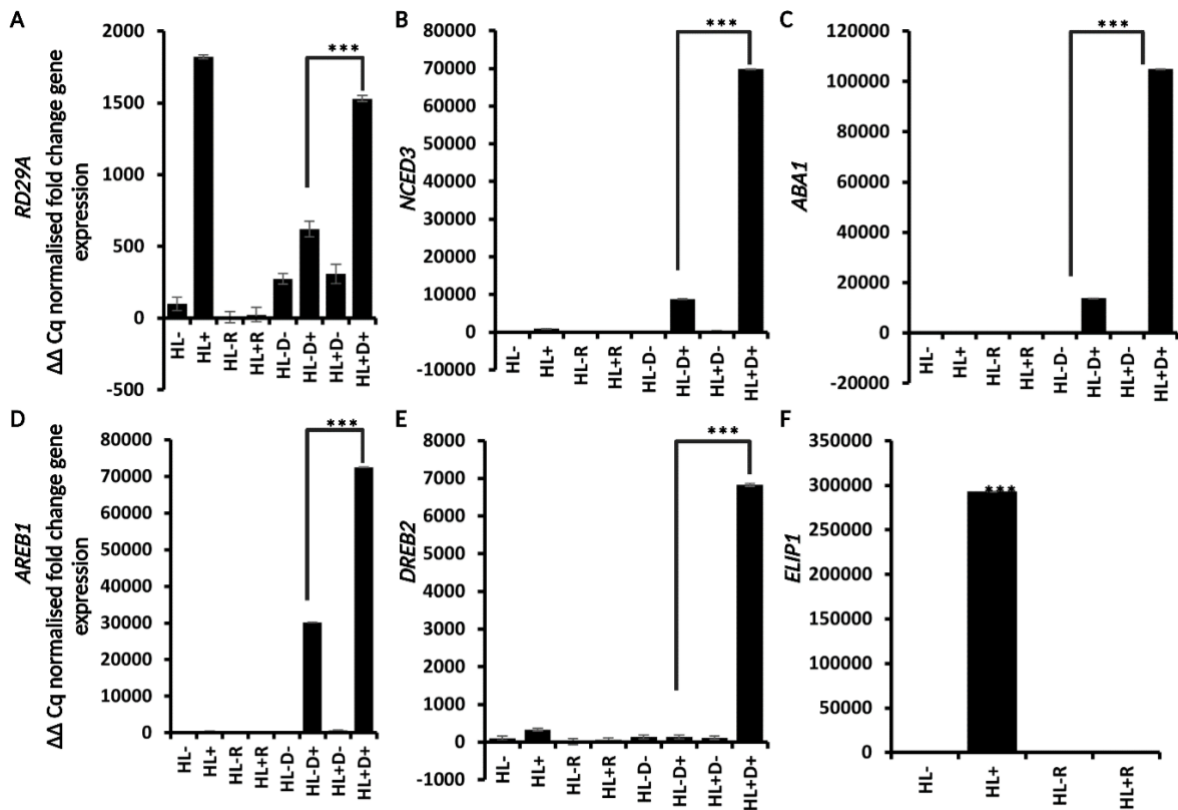

**Figure S5: *RD29A* and ABA responsive genes expression pattern in Col-O, related to Figure 5**

(A-E) qPCR analysis of *RD29A*, *NCED3*, *ABA1*, *AREB1*, and *DREB2* at 3 timepoints. (F) Expression analysis of *ELIP1* only at the first two timepoints. Data is a representation of third biological replicate with SD values.  
\*\*\*  $p < 0.001$

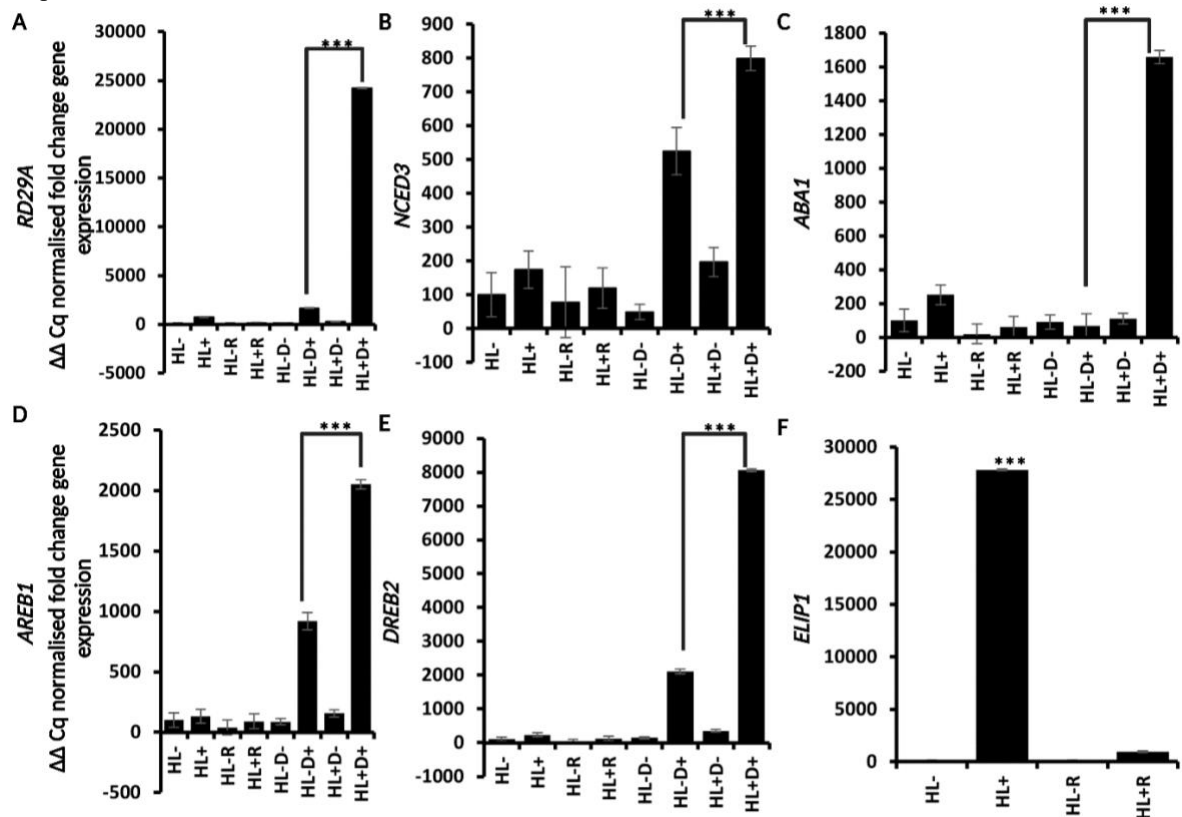

**Figure S6: *RD29A* and ABA responsive genes expression pattern in *aba1-3* mutant, related to Figure 6**

(A-E) qPCR analysis of *RD29A*, *NCED3*, *ABA1*, *AREB1*, and *DREB2* at 3 timepoints. (F) Expression analysis of *ELIP1* only at the first two timepoints. Data is a representation of second biological replicate with SD values.  
\*\*\*  $p < 0.001$

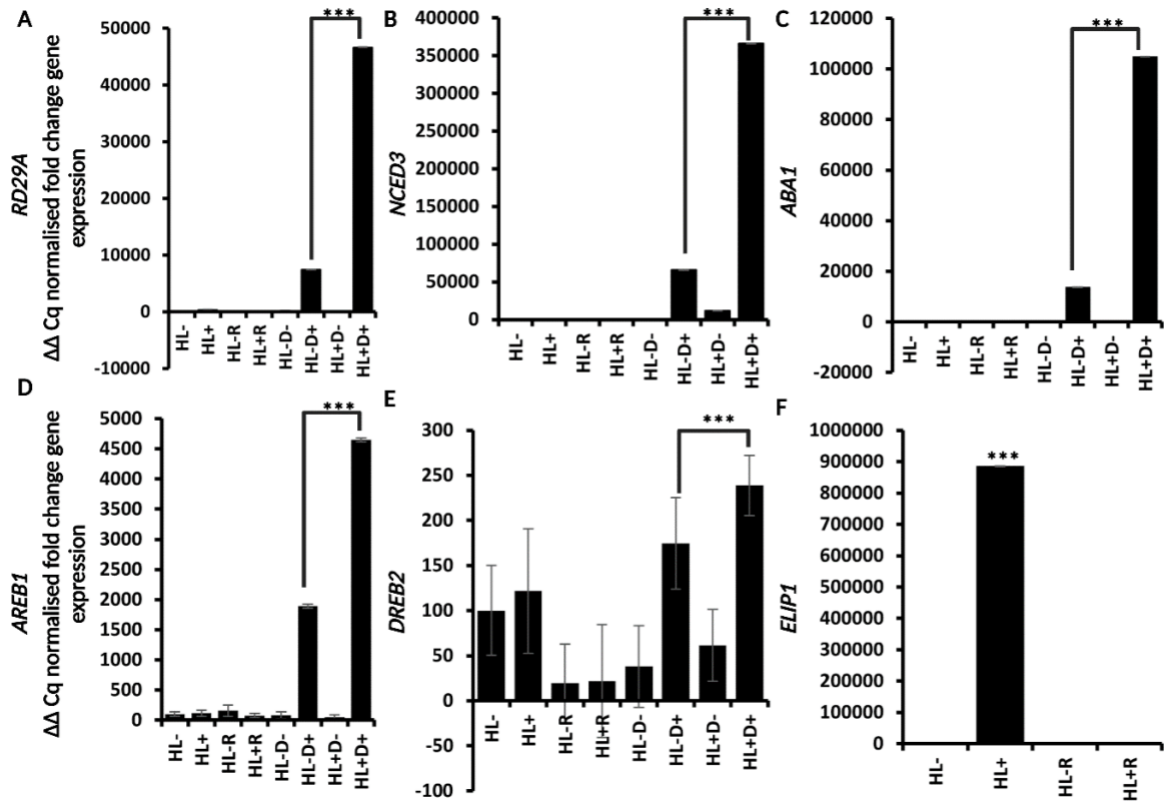

**Figure S7: *RD29A* and ABA responsive genes expression pattern in *aba1-3* mutant, related to Figure 6** (A-E) qPCR analysis of *RD29A*, *NCED3*, *ABA1*, *AREB1*, and *DREB2* at 3 timepoints. (F) Expression analysis of *ELIP1* only at the first two timepoints. Data is a representation of third biological replicate with SD values. \*\*\*  $p < 0.001$

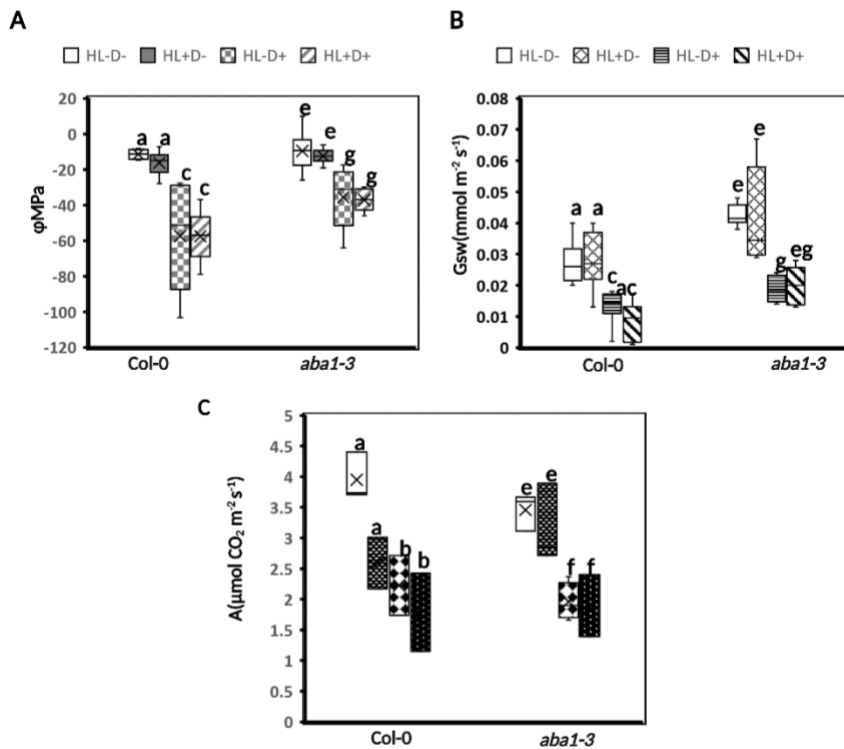

**Figure S8. Water, conductance, and assimilation responses were triggered by D but HL treatment had little to no effect on these responses after subsequent D stress, related to Figure 7**

(A) Relative water potential, (B) stomatal conductance, and (C) carbon assimilation responses were altered by D independent of HL pre-treatments. Measurements were taken at the end of the subjective drought period for all four treatments. The data are a representation of the second biological replicate with mean values. Statistical significance analysed by one-way ANOVA test and post-hoc Tukey's HSD test.

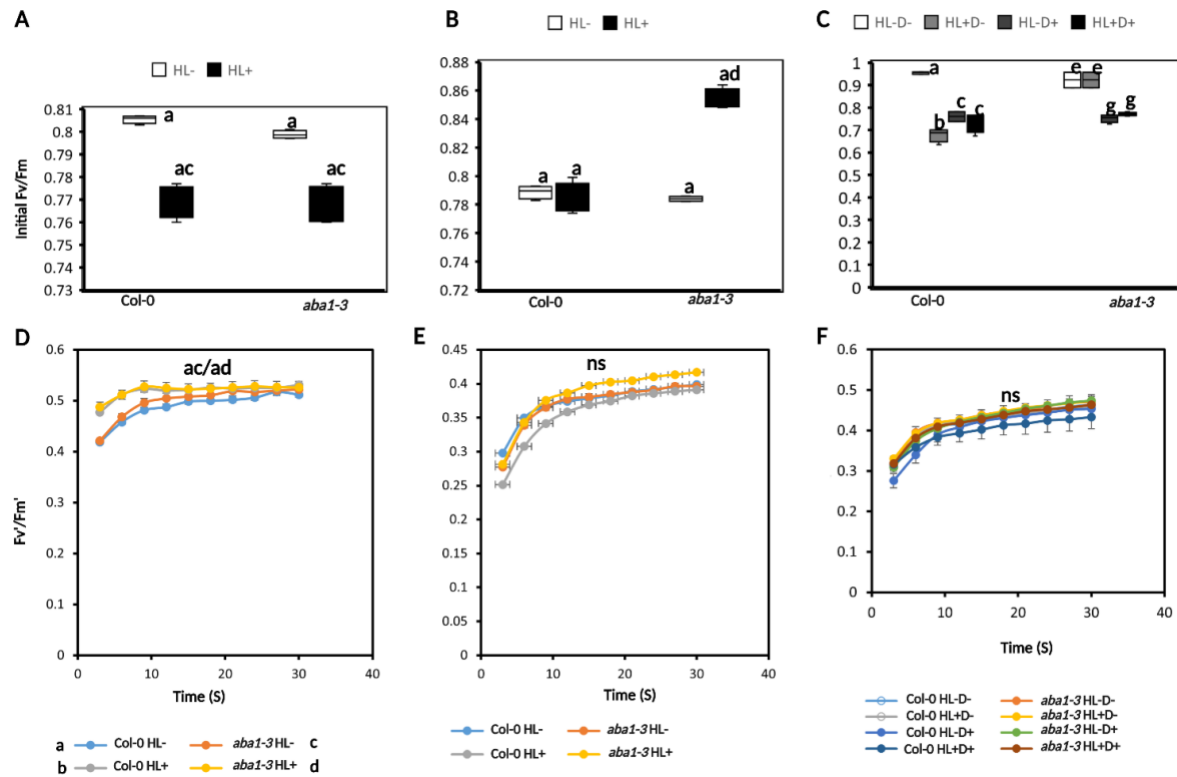

**Figure S9. Photosynthetic initiation was not affected by D and HL stress, related to Figure 8**

(A) Initial  $F_v/F_m$  measurement after HL stress. (B) Initial  $F_v/F_m$  after recovery. (C) Initial  $F_v/F_m$  after D stress. (D) Photosynthesis induction ( $F_v'/F_m'$ ) over 30 seconds after HL stress. (E) Photosynthesis induction after recovery. (F) Photosynthesis induction after D stress. Data is a representation of second biological replicate with mean values. Statistical significance analysed by one-way ANOVA test and post-hoc Tukey's HSD test.

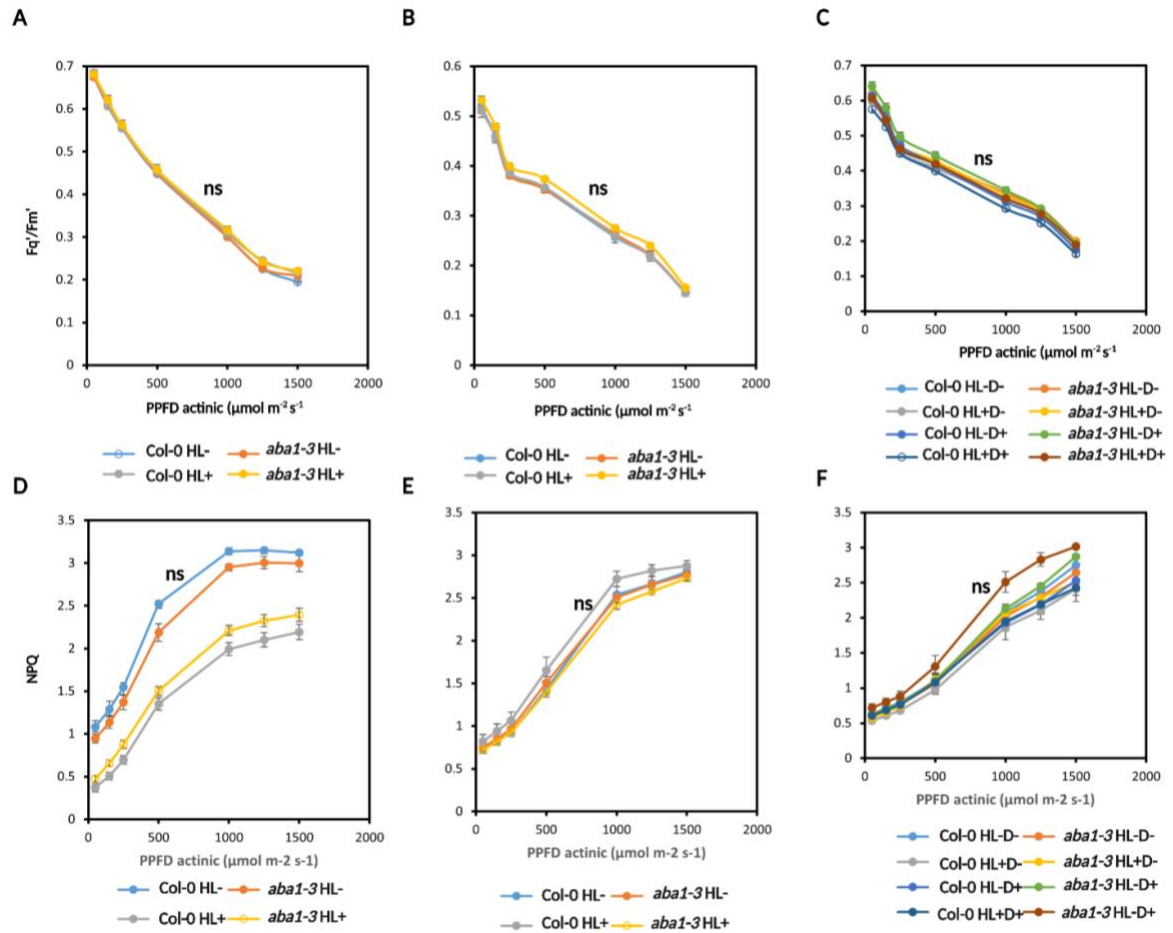

**Figure S10. Photosynthesis performance was not affected in response to D and HL, related to Figure 9**  
 (A) CF images of WT rosette after HL stress at first pixel measurements on  $F_o$ ,  $F_m$ ,  $F'$ ,  $F_m'$ ,  $F_m/F_m'-1$ , and  $F_q/F_m'$ . (B) Photosynthesis operating efficiency measured by CF imaging using a light response curve of actinic light between 50-1500  $\mu\text{mol m}^{-2} \text{s}^{-1}$  after HL stress. (C) Photosynthesis operating efficiency measured after recovery stress. (D) Photosynthesis operating efficiency measured after D stress. (E) NPQ measured using a light response curve of actinic light between 50-1500  $\mu\text{mol m}^{-2} \text{s}^{-1}$  after HL stress. (F) NPQ measured after recovery. (G) NPQ measured after D stress. Data is a representation of second biological replicate with mean values. Statistical significance analysed by one-way ANOVA test and post-hoc Tukey's HSD test. ns = not significant.

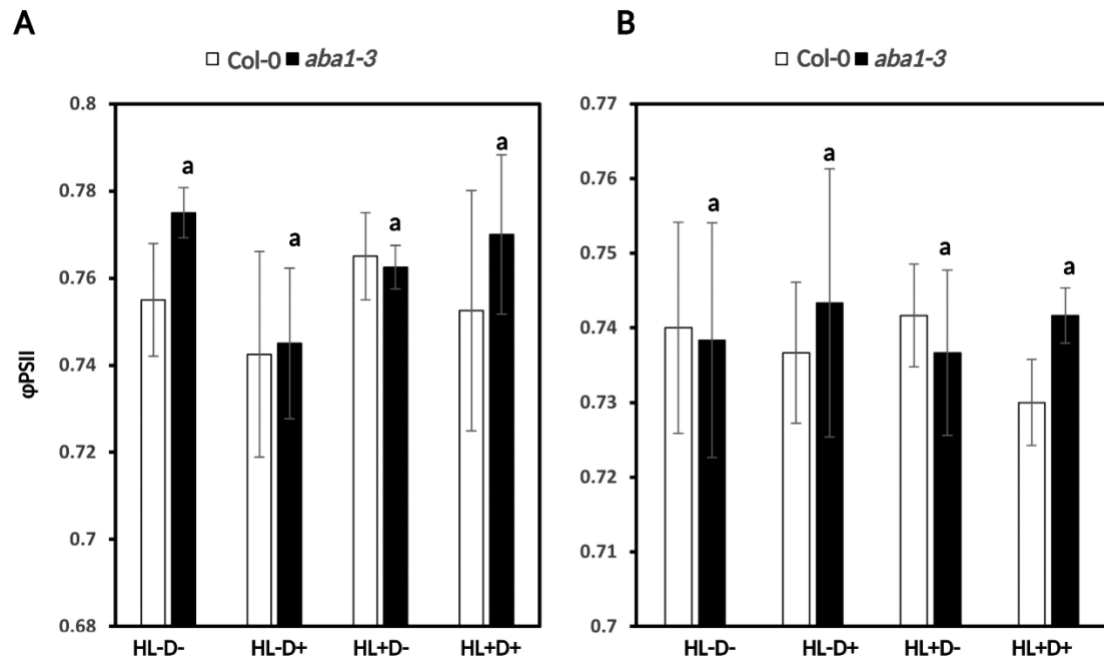

**Figure S11: Quantum yield of fluorescence measured after D stress, related to Figure 9**  
(A-B) Data is a representation of two replicates. Statistical significance analysed by one-way ANOVA test and post-hoc Tukey's HSD test.

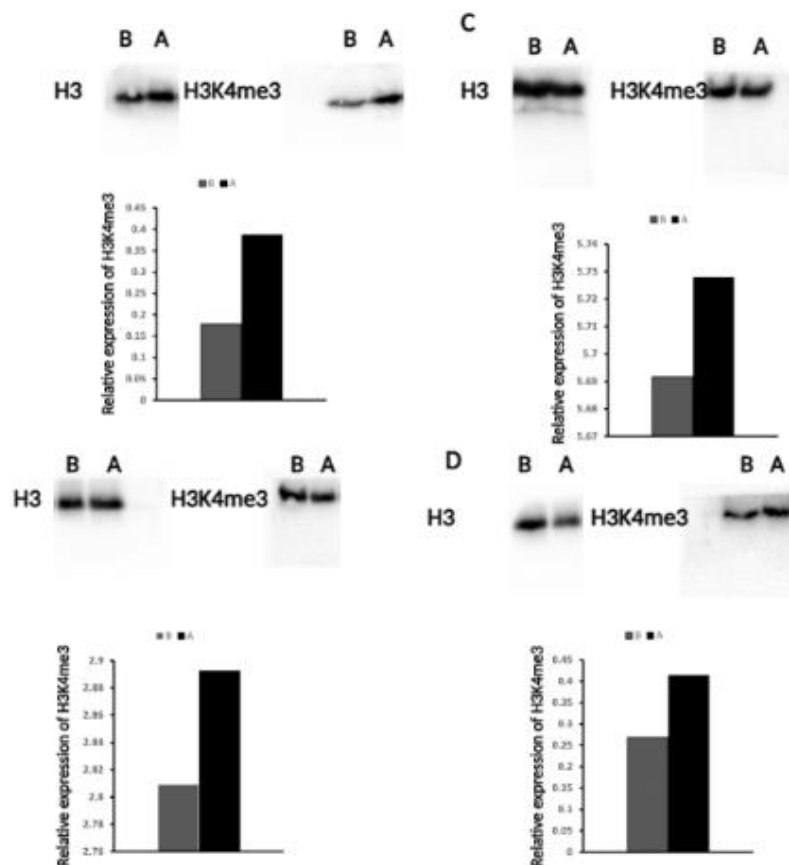

**Figure S12. H3K4me3 increased in response to D and HL, related to Figure 10**

(A-B) Immunoblot of WT plants stressed with D at 3-week-old. Histone extracts were probed with H3K4me3 specific antibodies, and H3 was used as loading control. Relative expression obtained from two independent replicate with densitometric analysis. (C-D) Immunoblot of WT plants stressed with HL at 3-week-old. Relative expression obtained from two independent replicate.



**Table S1. Primers used in this study**

| <b>qPCR</b>  | <b>Forward</b>           | <b>Reverse</b>             | <b>Source</b>            |
|--------------|--------------------------|----------------------------|--------------------------|
| <i>Act8</i>  | AAACCCGCTCTCGCTCTTAC     | CTGAGTTTGAAACGCGGATT       | This study               |
| <i>UBQ10</i> | GGTTTGTGTTTTGGGGCCTTG    | CGAAGCGATGATAAAGAAGAAGTTCG | This study               |
| <i>RD29A</i> | CCGGAATCTGACGGCCGTTTA    | CCGTCGGCACATTCTGTCGAT      | Lee et al., 2016         |
| <i>ELIP1</i> | TCGCAAGATCAACACCAACAA    | AGGTTAGGGAAGCTACCGGC       | This study               |
| <i>AREB1</i> | AACAGGCTTACACCGTGGAG     | CTTTGGACCTCCTTGCAGAA       | Roca Paixao et al., 2019 |
| <i>DREB2</i> | GACCTAAATGGCGACGATGT     | TCGAGCTGAAACGGAGGTAT       | Sakuma et al., 2006      |
| <i>ABA1</i>  | GATGCAGCCAAATATGGGTCAAGG | GCCATTGCATGGATAATAGCGACTC  | This study               |
| <i>NCED3</i> | GGTGGTTTACGACAAGAACAA    | CAGAAGCAATCTGGAGCATCAA     | This study               |
